# Supplementary material
Source: Springer Nature journal article supplement (https://www.springermedizin.de/resource/supplementary/12879_2013_3338_MOESM2_ESM.pdf/9446208)

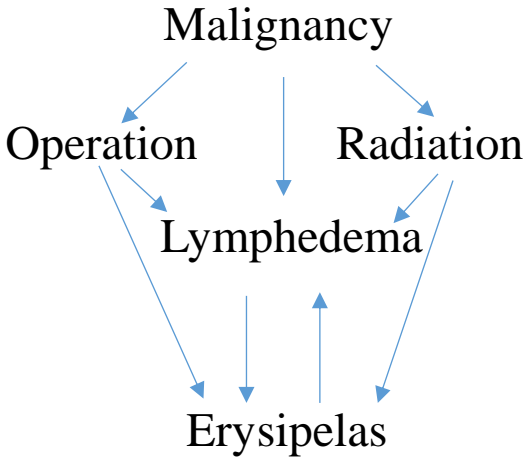

Supplement: MOESM2 [file 9446208]
